# Supplementary material
Source: MDPI journal article supplement (https://www.mdpi.com/2073-4433/10/4/226)

## Supporting Information

### **Size-segregated chemical compositions of HULISs in ambient aerosols collected during the winter season in Songdo, South Korea**

Kyoung-Soon Jang <sup>1,2,\*</sup>, A Young Choi <sup>1</sup>, Mira Choi <sup>1</sup>, Hyunju Kang <sup>1</sup>, Tae-Wook Kim <sup>3</sup> and Ki-Tae Park <sup>4,\*</sup>

<sup>1</sup> Biomedical Omics Center, Korea Basic Science Institute, Cheongju 28119, Republic of Korea

<sup>2</sup> Division of Bio-Analytical Science, University of Science and Technology, Daejeon 34113, Republic of Korea

<sup>3</sup> Division of Environmental Science and Ecological Engineering, Korea University, Seoul 02841, Republic of Korea

<sup>4</sup> Korea Polar Research Institute, Incheon 21990, Republic of Korea

#### **Correspondence and requests for materials should be addressed to**

Kyoung-Soon Jang, E-mail: [ksjang@kbsi.re.kr](mailto:ksjang@kbsi.re.kr); Tel.: +82-43-240-5196; fax: +82-43-240-5158.

Ki-Tae Park, E-mail: [ktpark@kopri.re.kr](mailto:ktpark@kopri.re.kr); Tel.: +82-32-760-5608; fax: +82-32-770-8709.

**Supplementary Figure S1.** Size-resolved samples (eight size cuts between 0.43 and 11  $\mu\text{m}$ ) collected during the (a) preheating [27 November–1 December], (b) main heating [8–12 January] and (c) postheating [12–16 March] periods using an Anderson-type air sampler.

**Supplementary Figure S2.** Relationships of the particle size with the mean DBE, AI, H/C, and O/C values of CHO class species during each sampling period. The solid lines indicate the best fit.

**Supplementary Figure S3.** Relationships of the particle size with the mean DBE, AI, H/C, and O/C values of CHON class species during each sampling period. The solid lines indicate the best fit.

**Supplementary Figure S4.** Relationships of the particle size with the mean DBE, AI, H/C, and O/C values of CHOS class species during each sampling period. The solid lines indicate the best fit.

**Supplementary Figure S5.** Carbon number and DBE plots of the HULISs in particles between 1.1 and 2.1  $\mu\text{m}$  (stage three fractions) in the pre- (**a**, **d**, **g** and **j**), main- (**b**, **e**, **h** and **k**), and postheating (**c**, **f**, **i** and **l**) periods. (Color code: CHO, blue; CHON, red; CHOS, green; and CHONS, purple).

**Supplementary Figure S6.** Results for three day air mass back trajectories collected at hourly intervals during each sampling period. (**a**) preheating, (**b**) main heating and (**c**) postheating periods. The black star indicates the sampling spot of Songdo.

**Suppl. Fig. S1.**

**(a)**

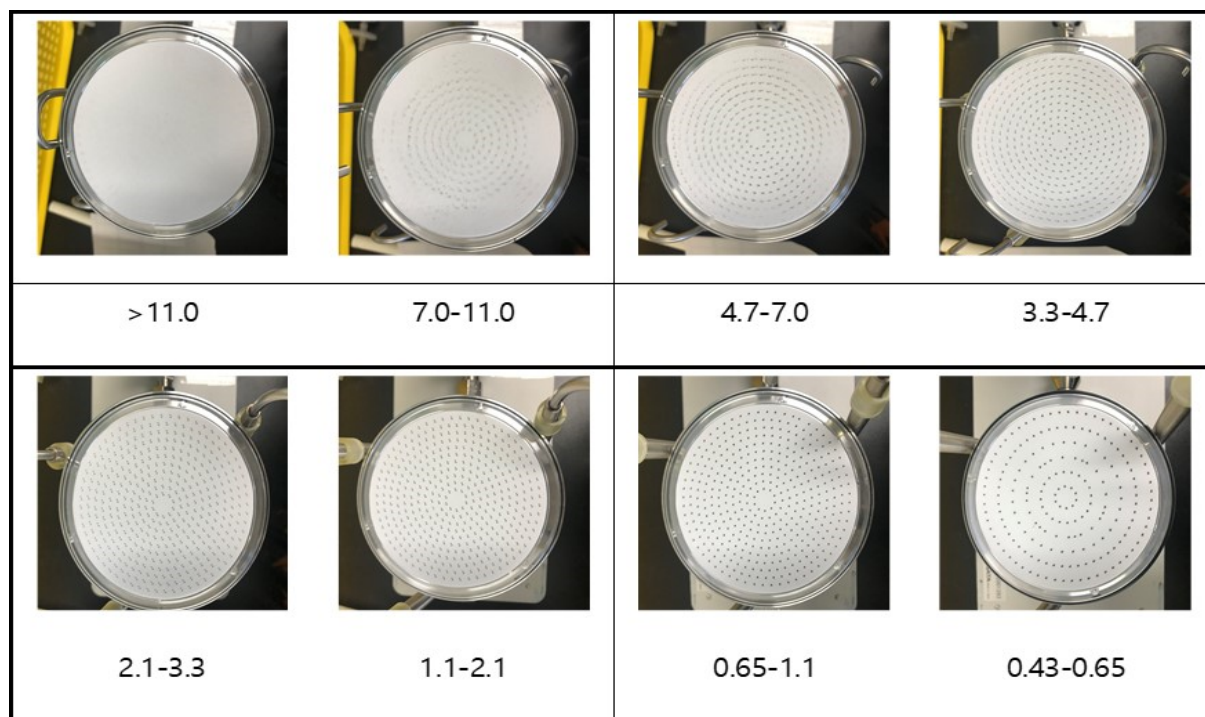

**Suppl. Fig. S1. *continued.***

**(b)**

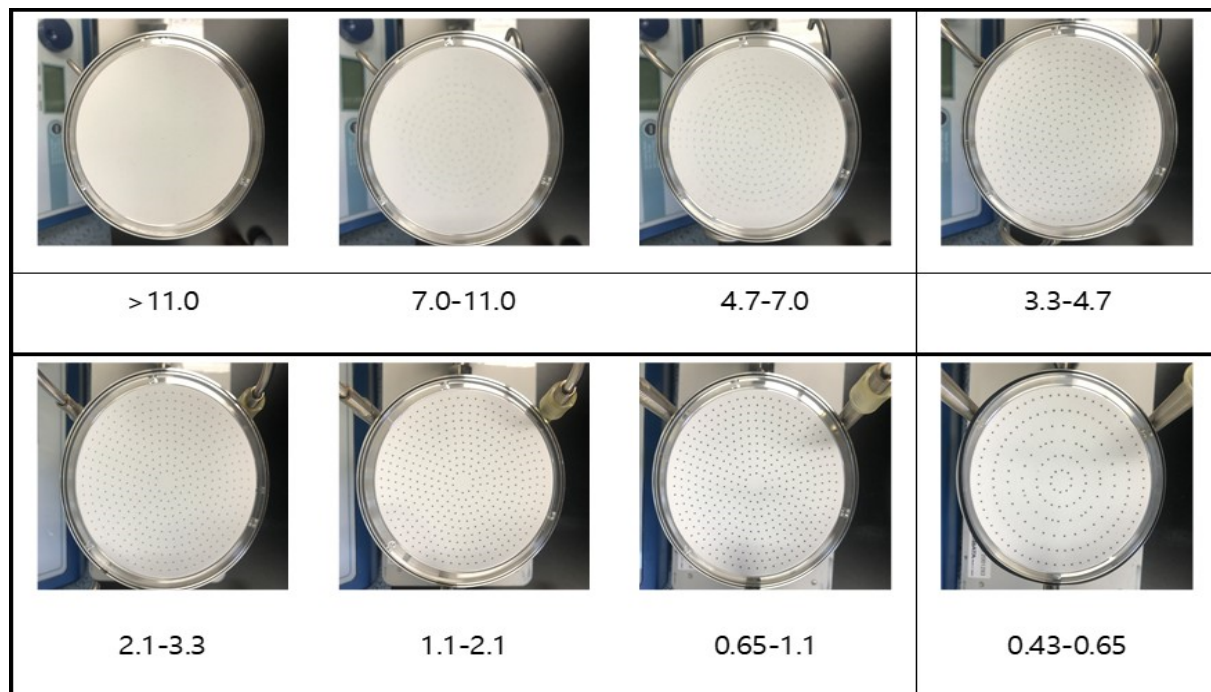

**Suppl. Fig. S1. *continued.***

**(c)**

|                                                                                   |                                                                                   |                                                                                    |                                                                                     |
|-----------------------------------------------------------------------------------|-----------------------------------------------------------------------------------|------------------------------------------------------------------------------------|-------------------------------------------------------------------------------------|
|  |  |  |  |
| >11.0                                                                             | 7.0-11.0                                                                          | 4.7-7.0                                                                            | 3.3-4.7                                                                             |
|  |  |  |  |
| 2.1-3.3                                                                           | 1.1-2.1                                                                           | 0.65-1.1                                                                           | 0.43-0.65                                                                           |

Suppl. Fig. S2.

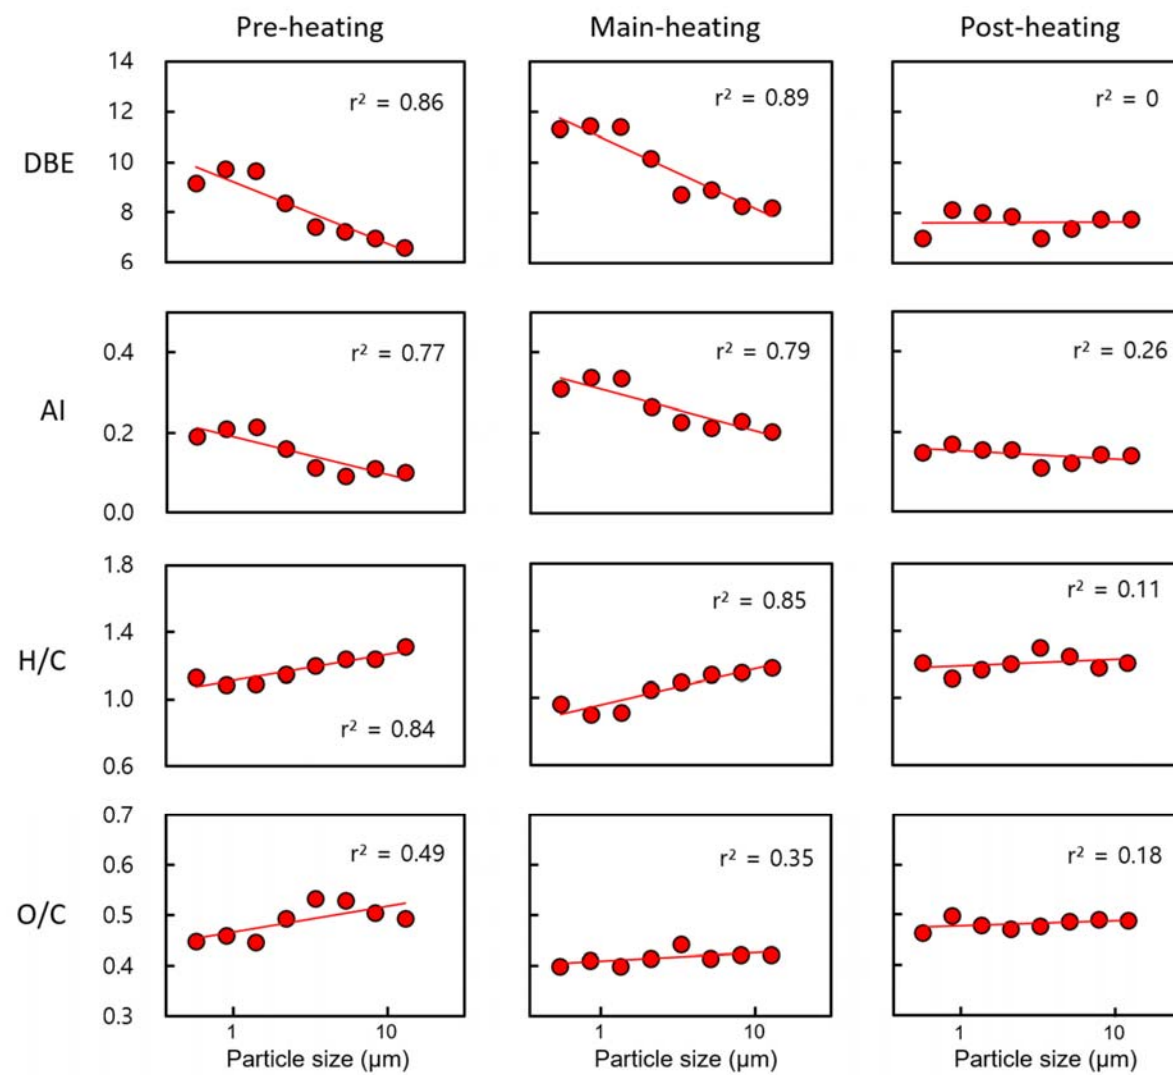

Suppl. Fig. S3.

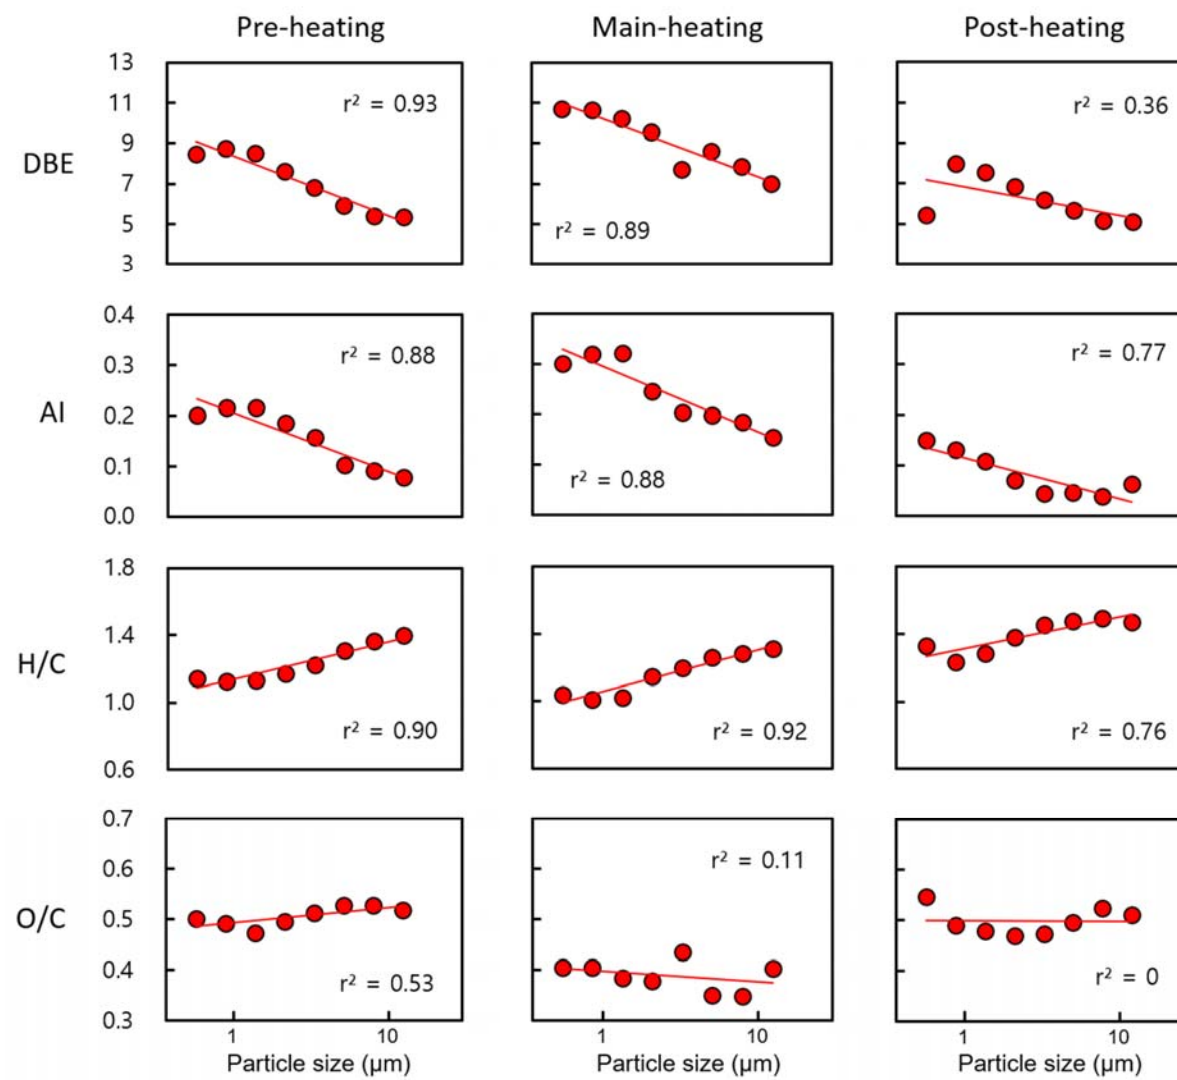

Suppl. Fig. S4.

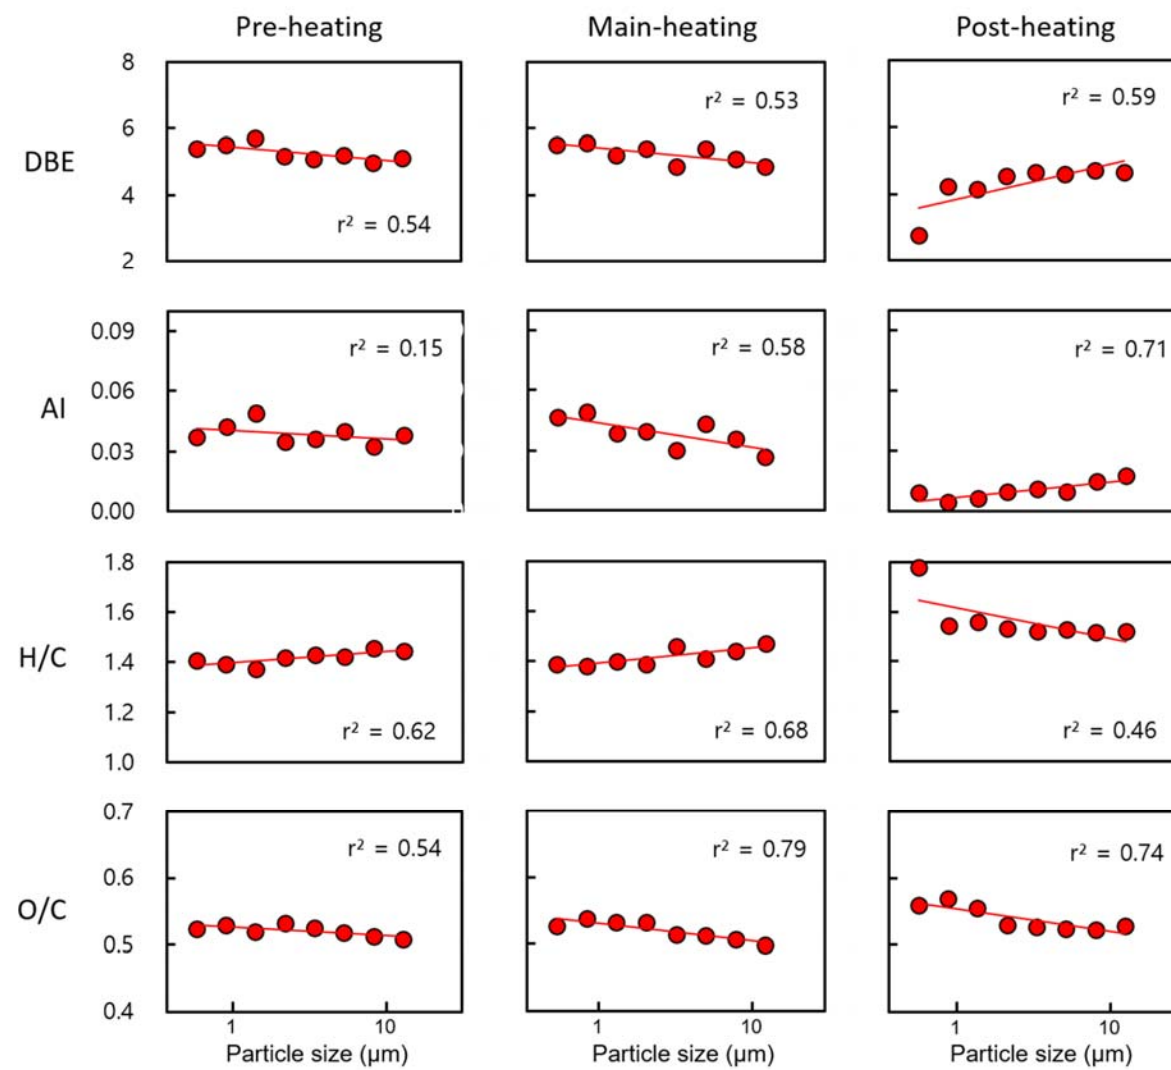



Suppl. Fig. S5.

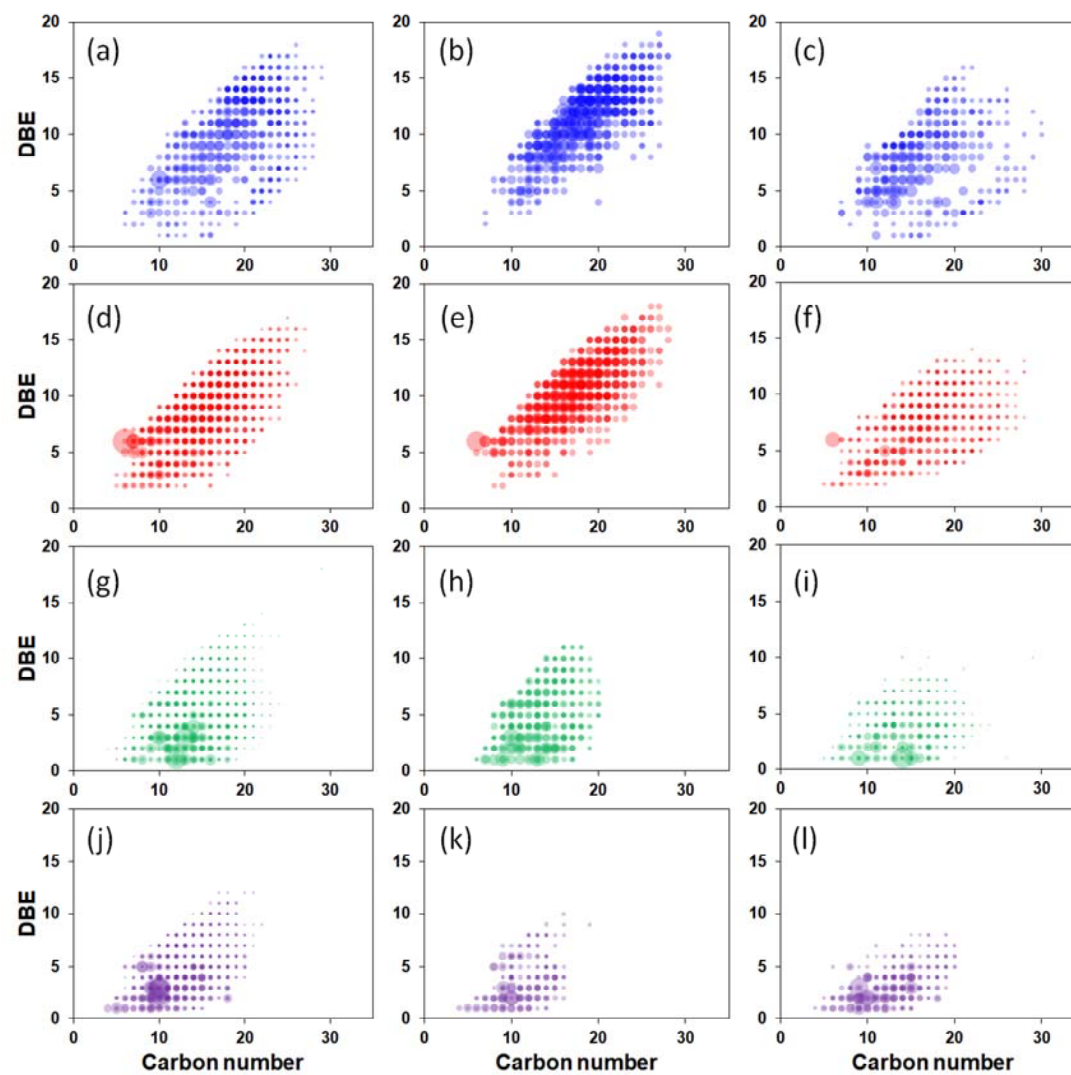

Suppl. Fig. S6.

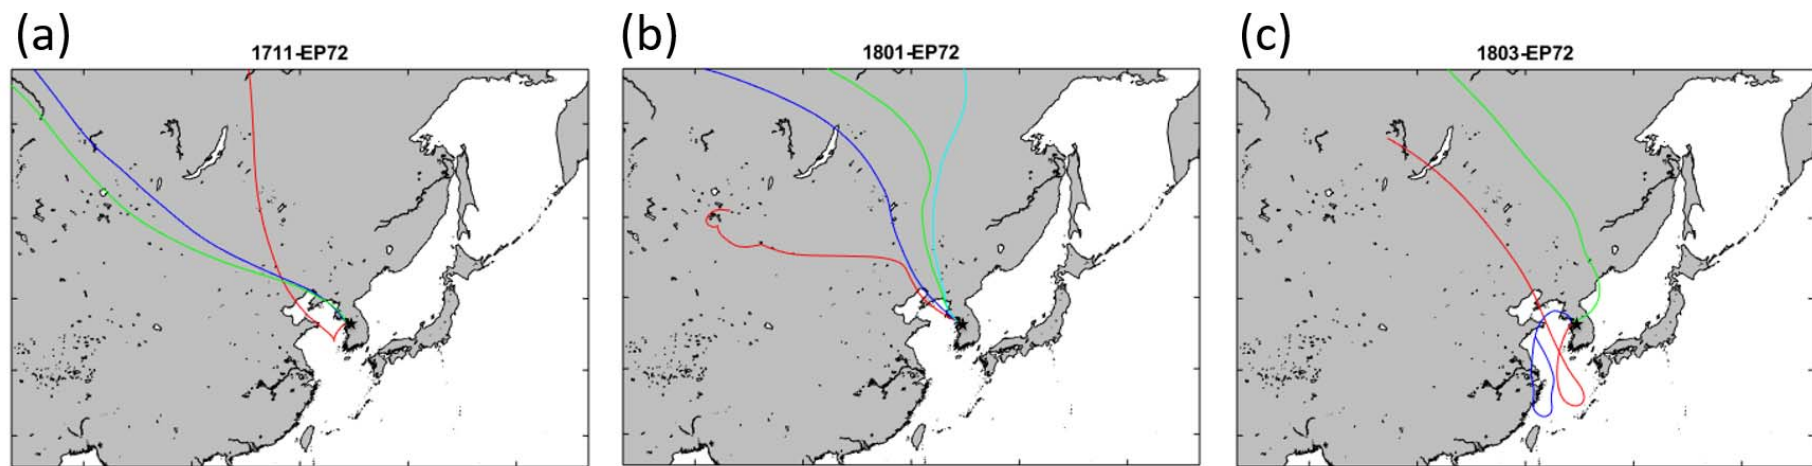

Supplement: s1 [file s1]
