# Supplementary material
Source: MDPI journal article supplement (https://www.mdpi.com/2073-4433/10/4/226)
Supplement: s1 [file s1]

**Supplementary Table S1.** Summary of the chemical properties of the assigned compositions of HULISs in the size-segregated aerosols.

| Sampling Date             | Stage No. | Particle Size ( $\mu\text{m}$ ) | Assigned Peaks | Mean DBE* | Mean AI** | Mean H/C | Mean O/C | Mean N/C | Mean S/C |
|---------------------------|-----------|---------------------------------|----------------|-----------|-----------|----------|----------|----------|----------|
| November 7-<br>December 1 | 1         | 0.43-0.65                       | 2888           | 7.295     | 0.128     | 1.261    | 0.519    | 0.054    | 0.03106  |
|                           | 2         | 0.65-1.1                        | 3035           | 7.577     | 0.140     | 1.236    | 0.517    | 0.054    | 0.03165  |
|                           | 3         | 1.1-2.1                         | 2873           | 7.379     | 0.135     | 1.248    | 0.506    | 0.049    | 0.03402  |
|                           | 4         | 2.1-3.3                         | 2063           | 6.199     | 0.091     | 1.332    | 0.537    | 0.045    | 0.04499  |
|                           | 5         | 3.3-4.7                         | 1801           | 5.550     | 0.062     | 1.393    | 0.546    | 0.045    | 0.05331  |
|                           | 6         | 4.7-7.0                         | 1694           | 5.224     | 0.044     | 1.435    | 0.543    | 0.044    | 0.05942  |
|                           | 7         | 7.0-11.0                        | 1468           | 4.893     | 0.035     | 1.480    | 0.538    | 0.042    | 0.06388  |
|                           | 8         | >11.0                           | 1516           | 4.983     | 0.038     | 1.476    | 0.534    | 0.041    | 0.06092  |
| January 8-12              | 1         | 0.43-0.65                       | 2933           | 9.156     | 0.219     | 1.144    | 0.456    | 0.047    | 0.02387  |
|                           | 2         | 0.65-1.1                        | 1150           | 9.418     | 0.247     | 1.105    | 0.454    | 0.049    | 0.02257  |
|                           | 3         | 1.1-2.1                         | 1644           | 8.925     | 0.238     | 1.124    | 0.449    | 0.040    | 0.02446  |
|                           | 4         | 2.1-3.3                         | 2413           | 8.049     | 0.168     | 1.235    | 0.453    | 0.044    | 0.02979  |
|                           | 5         | 3.3-4.7                         | 1305           | 6.079     | 0.099     | 1.362    | 0.504    | 0.040    | 0.04868  |
|                           | 6         | 4.7-7.0                         | 2309           | 7.009     | 0.118     | 1.338    | 0.447    | 0.044    | 0.03731  |
|                           | 7         | 7.0-11.0                        | 1597           | 6.143     | 0.099     | 1.389    | 0.465    | 0.040    | 0.04578  |
|                           | 8         | >11.0                           | 1099           | 5.642     | 0.076     | 1.426    | 0.491    | 0.034    | 0.05087  |
| March 12-16               | 1         | 0.43-0.65                       | 1139           | 4.230     | 0.067     | 1.577    | 0.589    | 0.052    | 0.04897  |
|                           | 2         | 0.65-1.1                        | 1813           | 6.632     | 0.092     | 1.338    | 0.536    | 0.050    | 0.02788  |
|                           | 3         | 1.1-2.1                         | 1462           | 6.299     | 0.079     | 1.386    | 0.523    | 0.044    | 0.02913  |
|                           | 4         | 2.1-3.3                         | 1460           | 5.760     | 0.057     | 1.449    | 0.517    | 0.034    | 0.03769  |
|                           | 5         | 3.3-4.7                         | 1313           | 5.238     | 0.035     | 1.507    | 0.519    | 0.035    | 0.04452  |
|                           | 6         | 4.7-7.0                         | 1246           | 4.976     | 0.030     | 1.520    | 0.530    | 0.035    | 0.05292  |
|                           | 7         | 7.0-11.0                        | 1055           | 4.831     | 0.030     | 1.525    | 0.542    | 0.034    | 0.05825  |
|                           | 8         | >11.0                           | 1050           | 4.897     | 0.038     | 1.514    | 0.544    | 0.030    | 0.05710  |

\*The double bond equivalent (DBE) value representing the sum of rings and double bonds in each molecule can be calculated from the number of atoms in chemical formulae by the following equation:  $DBE = I + C - H/2 + N/2$ .

\*\*Aromaticity index

**Supplementary Table S2.** Basic air quality information in the Songdo area provided by the Air Korea website (<http://www.airkorea.or.kr>) operated by the KME.

|                     | Date           | Temp <sub>mean</sub> (°C) | Temp <sub>min</sub> (°C) | Temp <sub>max</sub> (°C) | Instantaneous Wind Speed <sub>max</sub> (m/s) | Instantaneous wind speed direction <sub>max</sub> (16 directions) | Wind Speed <sub>max</sub> (m/s) | Wind speed direction <sub>max</sub> (16 directions) | Wind Speed <sub>mean</sub> (m/s) | Dew-point Temp <sub>mean</sub> (°C) | Relative Humidity <sub>min</sub> (%) | Relative Humidity <sub>mean</sub> (%) | Vapor Pressure <sub>mean</sub> (hPa) | Atmospheric Pressure <sub>mean</sub> (hPa) | Ground Temp <sub>mean</sub> (°C) |
|---------------------|----------------|---------------------------|--------------------------|--------------------------|-----------------------------------------------|-------------------------------------------------------------------|---------------------------------|-----------------------------------------------------|----------------------------------|-------------------------------------|--------------------------------------|---------------------------------------|--------------------------------------|--------------------------------------------|----------------------------------|
| Pre-heating period  | 2017-11-27     | 1.7                       | -2.4                     | 7                        | 6                                             | 50                                                                | 3.8                             | 20                                                  | 2                                | -5.8                                | 37                                   | 58.4                                  | 4                                    | 1018.1                                     | 2.5                              |
|                     | 2017-11-28     | 6                         | 0.8                      | 10                       | 6.2                                           | 200                                                               | 4.3                             | 200                                                 | 2.1                              | 0.8                                 | 56                                   | 69.8                                  | 6.6                                  | 1013.7                                     | 4.2                              |
|                     | 2017-11-29     | 2.2                       | -2.4                     | 8.5                      | 12.7                                          | 20                                                                | 7.4                             | 360                                                 | 4.9                              | -7.2                                | 27                                   | 52.3                                  | 4                                    | 1017.8                                     | 4.2                              |
|                     | 2017-11-30     | -2.6                      | -4.7                     | 0.6                      | 12.7                                          | 340                                                               | 8.3                             | 340                                                 | 5.8                              | -16                                 | 20                                   | 35.8                                  | 1.8                                  | 1020.3                                     | 0                                |
|                     | 2017-12-01     | -1.6                      | -6.2                     | 2.6                      | 8.2                                           | 20                                                                | 5.1                             | 270                                                 | 2.6                              | -9.7                                | 24                                   | 59.1                                  | 3.4                                  | 1021.9                                     | -0.7                             |
|                     | <b>Average</b> | <b>1.14</b>               | <b>-2.98</b>             | <b>5.74</b>              | <b>9.16</b>                                   | <b>126</b>                                                        | <b>5.78</b>                     | <b>238</b>                                          | <b>3.48</b>                      | <b>-7.58</b>                        | <b>32.8</b>                          | <b>55.08</b>                          | <b>3.96</b>                          | <b>1018.36</b>                             | <b>2.04</b>                      |
| Heating period      | 2017-01-08     | 6.3                       | 4.1                      | 8.8                      | 8.4                                           | 340                                                               | 5.9                             | 340                                                 | 3.7                              | 1.2                                 | 57                                   | 70.3                                  | 6.7                                  | 1006                                       | 4.4                              |
|                     | 2017-01-09     | 1.9                       | -2.1                     | 4.4                      | 10.6                                          | 320                                                               | 7.1                             | 340                                                 | 4.8                              | -4.1                                | 44                                   | 66.3                                  | 4.7                                  | 1009.1                                     | 2.7                              |
|                     | 2017-01-10     | -2.4                      | -5.6                     | 0.6                      | 11.6                                          | 340                                                               | 8                               | 340                                                 | 4.4                              | -11.6                               | 33                                   | 49.6                                  | 2.6                                  | 1015.4                                     | -1.1                             |
|                     | 2017-01-11     | -1.9                      | -6.7                     | 2.3                      | 10.2                                          | 360                                                               | 6.8                             | 340                                                 | 2.9                              | -13.2                               | 25                                   | 42.6                                  | 2.4                                  | 1016.3                                     | -1.6                             |
|                     | 2017-01-12     | -0.7                      | -4.4                     | 3.1                      | 12.7                                          | 290                                                               | 7.2                             | 340                                                 | 4.6                              | -10.2                               | 28                                   | 51                                    | 3.1                                  | 1009.8                                     | -0.8                             |
|                     | <b>Average</b> | <b>0.64</b>               | <b>-2.94</b>             | <b>3.84</b>              | <b>10.7</b>                                   | <b>330</b>                                                        | <b>7</b>                        | <b>340</b>                                          | <b>4.08</b>                      | <b>-7.58</b>                        | <b>37.4</b>                          | <b>55.96</b>                          | <b>3.9</b>                           | <b>1011.32</b>                             | <b>0.72</b>                      |
| Post-heating period | 2017-03-12     | 7.4                       | 5.2                      | 11.4                     | 8.7                                           | 340                                                               | 5.7                             | 340                                                 | 2.3                              | 2.8                                 | 50                                   | 73.5                                  | 7.6                                  | 1012.2                                     | 7.7                              |
|                     | 2017-03-13     | 5.7                       | 2.1                      | 10                       | 9.1                                           | 360                                                               | 6.6                             | 340                                                 | 4                                | -2.4                                | 32                                   | 57.3                                  | 5.2                                  | 1010.2                                     | 6.3                              |
|                     | 2017-03-14     | 5.6                       | 2.2                      | 9.3                      | 16.9                                          | 340                                                               | 8.1                             | 360                                                 | 5                                | -6.4                                | 22                                   | 42.9                                  | 3.8                                  | 1010.6                                     | 5.2                              |
|                     | 2017-03-15     | 5.3                       | 1.5                      | 10.2                     | 7.6                                           | 250                                                               | 4.9                             | 360                                                 | 3.1                              | -6                                  | 26                                   | 45.1                                  | 4                                    | 1014.5                                     | 4.4                              |
|                     | 2017-03-16     | 5.3                       | 0.9                      | 10.8                     | 7.7                                           | 250                                                               | 5.3                             | 270                                                 | 2.3                              | -2.7                                | 27                                   | 59.1                                  | 5.1                                  | 1013.3                                     | 4.9                              |
|                     | <b>Average</b> | <b>5.86</b>               | <b>2.38</b>              | <b>10.34</b>             | <b>10</b>                                     | <b>308</b>                                                        | <b>6.12</b>                     | <b>334</b>                                          | <b>3.34</b>                      | <b>-2.94</b>                        | <b>31.4</b>                          | <b>55.58</b>                          | <b>5.14</b>                          | <b>1012.16</b>                             | <b>5.7</b>                       |

**Supplementary Table S3.** Chemical properties of the assigned molecular classes of HULISs in the size-segregated aerosols collected during the preheating period.

| Stage No.<br>(Particle size, $\mu\text{m}$ ) | Class | Mean DBE | Mean AI | Mean H/C | Mean O/C | Mean N/C | Mean S/C |
|----------------------------------------------|-------|----------|---------|----------|----------|----------|----------|
| <b>1</b><br>(0.43-0.65)                      | CHO   | 9.17     | 0.19    | 1.13     | 0.45     | 0.0000   | 0.0000   |
|                                              | CHON  | 8.46     | 0.20    | 1.14     | 0.50     | 0.0933   | 0.0000   |
|                                              | CHOS  | 5.40     | 0.04    | 1.41     | 0.52     | 0.0000   | 0.0719   |
|                                              | CHONS | 5.23     | 0.02    | 1.47     | 0.62     | 0.0801   | 0.0790   |
| <b>2</b><br>(0.65-1.1)                       | CHO   | 9.75     | 0.21    | 1.08     | 0.46     | 0.0000   | 0.0000   |
|                                              | CHON  | 8.74     | 0.22    | 1.12     | 0.49     | 0.0919   | 0.0000   |
|                                              | CHOS  | 5.52     | 0.04    | 1.39     | 0.53     | 0.0000   | 0.0729   |
|                                              | CHONS | 5.49     | 0.02    | 1.44     | 0.61     | 0.0814   | 0.0790   |
| <b>3</b><br>(1.1-2.1)                        | CHO   | 9.67     | 0.22    | 1.09     | 0.45     | 0.0000   | 0.0000   |
|                                              | CHON  | 8.52     | 0.22    | 1.13     | 0.47     | 0.0888   | 0.0000   |
|                                              | CHOS  | 5.72     | 0.05    | 1.37     | 0.52     | 0.0000   | 0.0726   |
|                                              | CHONS | 5.17     | 0.02    | 1.46     | 0.61     | 0.0838   | 0.0819   |
| <b>4</b><br>(2.1-3.3)                        | CHO   | 8.38     | 0.16    | 1.15     | 0.49     | 0.0000   | 0.0000   |
|                                              | CHON  | 7.60     | 0.19    | 1.17     | 0.50     | 0.0813   | 0.0000   |
|                                              | CHOS  | 5.16     | 0.03    | 1.42     | 0.53     | 0.0000   | 0.0757   |
|                                              | CHONS | 4.54     | 0.01    | 1.52     | 0.62     | 0.0900   | 0.0859   |
| <b>5</b><br>(3.3-4.7)                        | CHO   | 7.42     | 0.11    | 1.20     | 0.53     | 0.0000   | 0.0000   |
|                                              | CHON  | 6.84     | 0.16    | 1.22     | 0.51     | 0.0851   | 0.0000   |
|                                              | CHOS  | 5.10     | 0.04    | 1.43     | 0.52     | 0.0000   | 0.0753   |
|                                              | CHONS | 4.47     | 0.01    | 1.55     | 0.60     | 0.0891   | 0.0850   |
| <b>6</b><br>(4.7-7.0)                        | CHO   | 7.23     | 0.09    | 1.24     | 0.53     | 0.0000   | 0.0000   |
|                                              | CHON  | 5.92     | 0.10    | 1.31     | 0.53     | 0.0907   | 0.0000   |
|                                              | CHOS  | 5.19     | 0.04    | 1.42     | 0.52     | 0.0000   | 0.0748   |
|                                              | CHONS | 4.41     | 0.01    | 1.56     | 0.59     | 0.0878   | 0.0839   |
| <b>7</b><br>(7.0-11.0)                       | CHO   | 6.99     | 0.11    | 1.24     | 0.50     | 0.0000   | 0.0000   |
|                                              | CHON  | 5.38     | 0.09    | 1.37     | 0.53     | 0.0926   | 0.0000   |
|                                              | CHOS  | 4.97     | 0.03    | 1.46     | 0.51     | 0.0000   | 0.0744   |
|                                              | CHONS | 4.30     | 0.01    | 1.59     | 0.58     | 0.0863   | 0.0824   |
| <b>8</b><br>(>11.0)                          | CHO   | 6.60     | 0.10    | 1.31     | 0.49     | 0.0000   | 0.0000   |
|                                              | CHON  | 5.34     | 0.08    | 1.40     | 0.52     | 0.0884   | 0.0000   |
|                                              | CHOS  | 5.12     | 0.04    | 1.44     | 0.51     | 0.0000   | 0.0736   |
|                                              | CHONS | 4.29     | 0.01    | 1.59     | 0.59     | 0.0859   | 0.0827   |
| <b>Overall</b>                               | CHO   | 8.15     | 0.15    | 1.18     | 0.49     | 0.0000   | 0.0000   |
|                                              | CHON  | 7.10     | 0.16    | 1.23     | 0.51     | 0.0890   | 0.0000   |
|                                              | CHOS  | 5.27     | 0.04    | 1.42     | 0.52     | 0.0000   | 0.0739   |
|                                              | CHONS | 4.74     | 0.01    | 1.52     | 0.60     | 0.0855   | 0.0825   |

**Supplementary Table S4.** Chemical properties of the assigned molecular classes of HULISs in the size-segregated aerosols collected during the main heating period.

| Stage No.<br>(Particle size, $\mu\text{m}$ ) | Class | Mean DBE | Mean AI | Mean H/C | Mean O/C | Mean N/C | Mean S/C |
|----------------------------------------------|-------|----------|---------|----------|----------|----------|----------|
| 1<br>(0.43-0.65)                             | CHO   | 11.34    | 0.31    | 0.96     | 0.40     | 0.0000   | 0.0000   |
|                                              | CHON  | 10.70    | 0.30    | 1.04     | 0.40     | 0.0771   | 0.0000   |
|                                              | CHOS  | 5.51     | 0.05    | 1.39     | 0.53     | 0.0000   | 0.0728   |
|                                              | CHONS | 5.08     | 0.02    | 1.48     | 0.63     | 0.0804   | 0.0798   |
| 2<br>(0.65-1.1)                              | CHO   | 11.46    | 0.34    | 0.90     | 0.41     | 0.0000   | 0.0000   |
|                                              | CHON  | 10.65    | 0.32    | 1.01     | 0.41     | 0.0837   | 0.0000   |
|                                              | CHOS  | 5.57     | 0.05    | 1.38     | 0.54     | 0.0000   | 0.0745   |
|                                              | CHONS | 5.07     | 0.03    | 1.52     | 0.64     | 0.0818   | 0.0816   |
| 3<br>(1.1-2.1)                               | CHO   | 11.42    | 0.34    | 0.91     | 0.40     | 0.0000   | 0.0000   |
|                                              | CHON  | 10.22    | 0.32    | 1.02     | 0.38     | 0.0753   | 0.0000   |
|                                              | CHOS  | 5.21     | 0.04    | 1.40     | 0.53     | 0.0000   | 0.0770   |
|                                              | CHONS | 3.98     | 0.01    | 1.59     | 0.70     | 0.0902   | 0.0902   |
| 4<br>(2.1-3.3)                               | CHO   | 10.18    | 0.26    | 1.05     | 0.41     | 0.0000   | 0.0000   |
|                                              | CHON  | 9.57     | 0.25    | 1.15     | 0.38     | 0.0754   | 0.0000   |
|                                              | CHOS  | 5.41     | 0.04    | 1.39     | 0.53     | 0.0000   | 0.0763   |
|                                              | CHONS | 4.84     | 0.01    | 1.51     | 0.59     | 0.0827   | 0.0819   |
| 5<br>(3.3-4.7)                               | CHO   | 8.74     | 0.23    | 1.09     | 0.44     | 0.0000   | 0.0000   |
|                                              | CHON  | 7.72     | 0.20    | 1.20     | 0.43     | 0.0833   | 0.0000   |
|                                              | CHOS  | 4.87     | 0.03    | 1.46     | 0.51     | 0.0000   | 0.0767   |
|                                              | CHONS | 4.45     | 0.01    | 1.57     | 0.59     | 0.0878   | 0.0866   |
| 6<br>(4.7-7.0)                               | CHO   | 8.94     | 0.21    | 1.14     | 0.41     | 0.0000   | 0.0000   |
|                                              | CHON  | 8.59     | 0.20    | 1.26     | 0.35     | 0.0722   | 0.0000   |
|                                              | CHOS  | 5.41     | 0.04    | 1.41     | 0.51     | 0.0000   | 0.0736   |
|                                              | CHONS | 5.16     | 0.02    | 1.50     | 0.54     | 0.0784   | 0.0768   |
| 7<br>(7.0-11.0)                              | CHO   | 8.28     | 0.23    | 1.15     | 0.42     | 0.0000   | 0.0000   |
|                                              | CHON  | 7.87     | 0.19    | 1.28     | 0.35     | 0.0743   | 0.0000   |
|                                              | CHOS  | 5.07     | 0.04    | 1.44     | 0.51     | 0.0000   | 0.0755   |
|                                              | CHONS | 4.49     | 0.01    | 1.57     | 0.55     | 0.0829   | 0.0811   |
| 8<br>(>11.0)                                 | CHO   | 8.22     | 0.20    | 1.18     | 0.42     | 0.0000   | 0.0000   |
|                                              | CHON  | 7.03     | 0.15    | 1.31     | 0.40     | 0.0766   | 0.0000   |
|                                              | CHOS  | 4.85     | 0.03    | 1.47     | 0.50     | 0.0000   | 0.0745   |
|                                              | CHONS | 4.04     | 0.01    | 1.62     | 0.59     | 0.0866   | 0.0852   |
| Overall                                      | CHO   | 9.82     | 0.27    | 1.05     | 0.42     | 0.0000   | 0.0000   |
|                                              | CHON  | 9.04     | 0.24    | 1.16     | 0.39     | 0.0772   | 0.0000   |
|                                              | CHOS  | 5.24     | 0.04    | 1.42     | 0.52     | 0.0000   | 0.0751   |
|                                              | CHONS | 4.64     | 0.02    | 1.55     | 0.60     | 0.0838   | 0.0829   |

**Supplementary Table S5.** Chemical properties of the assigned molecular classes of HULISs in the size-segregated aerosols collected during the postheating period.

| Stage No.<br>(Particle size, $\mu\text{m}$ ) | Class | Mean DBE | Mean AI | Mean H/C | Mean O/C | Mean N/C | Mean S/C |
|----------------------------------------------|-------|----------|---------|----------|----------|----------|----------|
| 1<br>(0.43-0.65)                             | CHO   | 7.00     | 0.15    | 1.21     | 0.46     | 0.0000   | 0.0000   |
|                                              | CHON  | 5.43     | 0.15    | 1.33     | 0.55     | 0.1080   | 0.0000   |
|                                              | CHOS  | 2.77     | 0.01    | 1.78     | 0.56     | 0.0000   | 0.0773   |
|                                              | CHONS | 3.36     | 0.01    | 1.75     | 0.76     | 0.0843   | 0.0843   |
| 2<br>(0.65-1.1)                              | CHO   | 8.12     | 0.17    | 1.12     | 0.50     | 0.0000   | 0.0000   |
|                                              | CHON  | 7.97     | 0.13    | 1.23     | 0.49     | 0.0830   | 0.0000   |
|                                              | CHOS  | 4.22     | 0.00    | 1.54     | 0.57     | 0.0000   | 0.0751   |
|                                              | CHONS | 4.03     | 0.00    | 1.64     | 0.67     | 0.0806   | 0.0800   |
| 3<br>(1.1-2.1)                               | CHO   | 8.03     | 0.16    | 1.17     | 0.48     | 0.0000   | 0.0000   |
|                                              | CHON  | 7.58     | 0.11    | 1.28     | 0.48     | 0.0766   | 0.0000   |
|                                              | CHOS  | 4.15     | 0.01    | 1.56     | 0.56     | 0.0000   | 0.0745   |
|                                              | CHONS | 3.66     | 0.00    | 1.70     | 0.65     | 0.0810   | 0.0803   |
| 4<br>(2.1-3.3)                               | CHO   | 7.87     | 0.16    | 1.20     | 0.47     | 0.0000   | 0.0000   |
|                                              | CHON  | 6.85     | 0.07    | 1.38     | 0.47     | 0.0671   | 0.0000   |
|                                              | CHOS  | 4.54     | 0.01    | 1.53     | 0.53     | 0.0000   | 0.0713   |
|                                              | CHONS | 3.76     | 0.00    | 1.69     | 0.62     | 0.0823   | 0.0792   |
| 5<br>(3.3-4.7)                               | CHO   | 6.99     | 0.11    | 1.30     | 0.48     | 0.0000   | 0.0000   |
|                                              | CHON  | 6.18     | 0.04    | 1.45     | 0.47     | 0.0683   | 0.0000   |
|                                              | CHOS  | 4.66     | 0.01    | 1.52     | 0.53     | 0.0000   | 0.0715   |
|                                              | CHONS | 3.98     | 0.00    | 1.68     | 0.58     | 0.0800   | 0.0766   |
| 6<br>(4.7-7.0)                               | CHO   | 7.36     | 0.12    | 1.25     | 0.49     | 0.0000   | 0.0000   |
|                                              | CHON  | 5.66     | 0.05    | 1.48     | 0.50     | 0.0750   | 0.0000   |
|                                              | CHOS  | 4.59     | 0.01    | 1.53     | 0.52     | 0.0000   | 0.0714   |
|                                              | CHONS | 4.03     | 0.01    | 1.66     | 0.57     | 0.0818   | 0.0778   |
| 7<br>(7.0-11.0)                              | CHO   | 7.77     | 0.14    | 1.18     | 0.49     | 0.0000   | 0.0000   |
|                                              | CHON  | 5.17     | 0.04    | 1.49     | 0.52     | 0.0834   | 0.0000   |
|                                              | CHOS  | 4.70     | 0.01    | 1.52     | 0.52     | 0.0000   | 0.0715   |
|                                              | CHONS | 3.73     | 0.00    | 1.69     | 0.60     | 0.0854   | 0.0810   |
| 8<br>(>11.0)                                 | CHO   | 7.73     | 0.14    | 1.21     | 0.49     | 0.0000   | 0.0000   |
|                                              | CHON  | 5.11     | 0.06    | 1.47     | 0.51     | 0.0858   | 0.0000   |
|                                              | CHOS  | 4.64     | 0.02    | 1.52     | 0.53     | 0.0000   | 0.0722   |
|                                              | CHONS | 3.56     | 0.00    | 1.71     | 0.62     | 0.0871   | 0.0832   |
| Overall                                      | CHO   | 7.61     | 0.14    | 1.20     | 0.48     | 0.0000   | 0.0000   |
|                                              | CHON  | 6.25     | 0.08    | 1.39     | 0.50     | 0.0809   | 0.0000   |
|                                              | CHOS  | 4.28     | 0.01    | 1.56     | 0.54     | 0.0000   | 0.0731   |
|                                              | CHONS | 3.77     | 0.00    | 1.69     | 0.63     | 0.0828   | 0.0803   |

**Supplementary Table S6.** Chemical properties of the assigned compound classes of HULISs in the size-segregated aerosols collected during the preheating period.

| Stage No.<br>(Particle size, $\mu\text{m}$ ) | Class                    | Mean DBE | Mean AI | Mean H/C | Mean O/C | Mean N/C | Mean S/C |
|----------------------------------------------|--------------------------|----------|---------|----------|----------|----------|----------|
| 1<br>(0.43-0.65)                             | Lignins                  | 9.08     | 0.16    | 1.10     | 0.45     | 0.0534   | 0.0217   |
|                                              | Tannins                  | 5.83     | 0.01    | 1.13     | 0.82     | 0.0692   | 0.0486   |
|                                              | Unsaturated hydrocarbons | 21.00    | 0.71    | 0.77     | 0.00     | 0.0866   | 0.0330   |
|                                              | Proteins                 | 3.69     | 0.00    | 1.72     | 0.51     | 0.0716   | 0.0392   |
|                                              | Carbohydrates            | 2.67     | 0.00    | 1.75     | 0.89     | 0.0895   | 0.0671   |
|                                              | Condensed aromatics      | 11.79    | 0.76    | 0.58     | 0.35     | 0.0668   | 0.0014   |
|                                              | Lipids                   | 3.82     | 0.00    | 1.72     | 0.27     | 0.0077   | 0.0309   |
| 2<br>(0.65-1.1)                              | Lignins                  | 9.26     | 0.17    | 1.10     | 0.45     | 0.0531   | 0.0221   |
|                                              | Tannins                  | 5.89     | 0.01    | 1.11     | 0.82     | 0.0659   | 0.0512   |
|                                              | Unsaturated hydrocarbons | 20.50    | 0.78    | 0.73     | 0.00     | 0.1455   | 0.0364   |
|                                              | Proteins                 | 3.68     | 0.00    | 1.72     | 0.51     | 0.0732   | 0.0407   |
|                                              | Carbohydrates            | 2.68     | 0.00    | 1.74     | 0.90     | 0.0862   | 0.0695   |
|                                              | Condensed aromatics      | 12.89    | 0.77    | 0.58     | 0.32     | 0.0806   | 0.0053   |
|                                              | Lipids                   | 3.70     | 0.00    | 1.72     | 0.27     | 0.0112   | 0.0395   |
| 3<br>(1.1-2.1)                               | Lignins                  | 9.09     | 0.17    | 1.10     | 0.44     | 0.0482   | 0.0242   |
|                                              | Tannins                  | 5.76     | 0.01    | 1.12     | 0.82     | 0.0623   | 0.0560   |
|                                              | Unsaturated hydrocarbons | 0.00     | 0.00    | 0.00     | 0.00     | 0.0000   | 0.0000   |
|                                              | Proteins                 | 3.69     | 0.00    | 1.71     | 0.50     | 0.0792   | 0.0457   |
|                                              | Carbohydrates            | 2.55     | 0.00    | 1.75     | 0.89     | 0.0742   | 0.0778   |
|                                              | Condensed aromatics      | 11.57    | 0.74    | 0.57     | 0.36     | 0.0608   | 0.0000   |
|                                              | Lipids                   | 3.84     | 0.01    | 1.70     | 0.26     | 0.0247   | 0.0293   |
| 4<br>(2.1-3.3)                               | Lignins                  | 8.10     | 0.13    | 1.14     | 0.46     | 0.0397   | 0.0320   |
|                                              | Tannins                  | 5.52     | 0.01    | 1.14     | 0.82     | 0.0620   | 0.0677   |
|                                              | Unsaturated hydrocarbons | 21.00    | 0.77    | 0.71     | 0.07     | 0.1429   | 0.0000   |
|                                              | Proteins                 | 3.62     | 0.00    | 1.72     | 0.50     | 0.0779   | 0.0529   |
|                                              | Carbohydrates            | 2.41     | 0.00    | 1.77     | 0.89     | 0.0661   | 0.0849   |
|                                              | Condensed aromatics      | 10.85    | 0.75    | 0.57     | 0.38     | 0.0631   | 0.0103   |
| 5<br>(3.3-4.7)                               | Lignins                  | 7.45     | 0.10    | 1.18     | 0.46     | 0.0380   | 0.0396   |
|                                              | Tannins                  | 5.42     | 0.01    | 1.15     | 0.83     | 0.0629   | 0.0768   |
|                                              | Unsaturated hydrocarbons | 21.00    | 0.77    | 0.71     | 0.07     | 0.1429   | 0.0000   |
|                                              | Proteins                 | 3.60     | 0.00    | 1.72     | 0.49     | 0.0785   | 0.0577   |
|                                              | Carbohydrates            | 2.38     | 0.00    | 1.78     | 0.90     | 0.0692   | 0.0881   |
|                                              | Condensed aromatics      | 10.67    | 0.76    | 0.56     | 0.37     | 0.0604   | 0.0222   |
|                                              | Lipids                   | 3.51     | 0.01    | 1.72     | 0.27     | 0.0214   | 0.0479   |
| 6<br>(4.7-7.0)                               | Lignins                  | 7.16     | 0.08    | 1.21     | 0.46     | 0.0343   | 0.0479   |
|                                              | Tannins                  | 5.23     | 0.01    | 1.15     | 0.85     | 0.0666   | 0.0819   |
|                                              | Unsaturated hydrocarbons | 27.00    | 0.57    | 0.84     | 0.07     | 0.0000   | 0.0000   |
|                                              | Proteins                 | 3.51     | 0.00    | 1.73     | 0.49     | 0.0785   | 0.0593   |
|                                              | Carbohydrates            | 2.39     | 0.00    | 1.78     | 0.90     | 0.0703   | 0.0913   |
|                                              | Condensed aromatics      | 11.25    | 0.79    | 0.50     | 0.37     | 0.0503   | 0.0490   |
|                                              | Lipids                   | 3.65     | 0.00    | 1.71     | 0.27     | 0.0257   | 0.0508   |
| 7<br>(7.0-11.0)                              | Lignins                  | 6.87     | 0.07    | 1.23     | 0.45     | 0.0321   | 0.0534   |
|                                              | Tannins                  | 5.11     | 0.01    | 1.18     | 0.84     | 0.0634   | 0.0896   |
|                                              | Unsaturated hydrocarbons | 0.00     | 0.00    | 0.00     | 0.00     | 0.0000   | 0.0000   |
|                                              | Proteins                 | 3.51     | 0.00    | 1.73     | 0.49     | 0.0777   | 0.0604   |
|                                              | Carbohydrates            | 2.34     | 0.00    | 1.79     | 0.91     | 0.0692   | 0.0957   |
|                                              | Condensed aromatics      | 11.33    | 0.84    | 0.51     | 0.28     | 0.0667   | 0.0889   |
|                                              | Lipids                   | 3.66     | 0.00    | 1.71     | 0.27     | 0.0290   | 0.0532   |
| 8<br>(>11.0)                                 | Lignins                  | 6.94     | 0.07    | 1.24     | 0.45     | 0.0315   | 0.0507   |
|                                              | Tannins                  | 5.09     | 0.00    | 1.19     | 0.83     | 0.0600   | 0.0883   |
|                                              | Unsaturated hydrocarbons | 0.00     | 0.00    | 0.00     | 0.00     | 0.0000   | 0.0000   |
|                                              | Proteins                 | 3.60     | 0.00    | 1.72     | 0.49     | 0.0745   | 0.0566   |
|                                              | Carbohydrates            | 2.36     | 0.00    | 1.78     | 0.90     | 0.0721   | 0.0937   |
|                                              | Condensed aromatics      | 11.75    | 0.82    | 0.48     | 0.29     | 0.0500   | 0.1000   |
|                                              | Lipids                   | 3.70     | 0.01    | 1.70     | 0.27     | 0.0237   | 0.0482   |

**Supplementary Table S7.** Chemical properties of the assigned compound classes of HULISs in the size-segregated aerosols collected during the main heating period.

| Stage No.<br>(Particle size, $\mu\text{m}$ ) | Class                    | Mean DBE | Mean AI | Mean H/C | Mean O/C | Mean N/C | Mean S/C |
|----------------------------------------------|--------------------------|----------|---------|----------|----------|----------|----------|
| 1<br>(0.43-0.65)                             | Lignins                  | 10.39    | 0.23    | 1.06     | 0.41     | 0.0472   | 0.0148   |
|                                              | Tannins                  | 5.64     | 0.01    | 1.16     | 0.78     | 0.0582   | 0.0568   |
|                                              | Unsaturated hydrocarbons | 8.00     | 0.33    | 1.30     | 0.10     | 0.0000   | 0.0000   |
|                                              | Proteins                 | 3.65     | 0.00    | 1.72     | 0.53     | 0.0708   | 0.0463   |
|                                              | Carbohydrates            | 2.53     | 0.00    | 1.77     | 0.86     | 0.0689   | 0.0871   |
|                                              | Condensed aromatics      | 13.11    | 0.74    | 0.57     | 0.31     | 0.0517   | 0.0008   |
|                                              | Lipids                   | 4.25     | 0.00    | 1.69     | 0.28     | 0.0161   | 0.0289   |
| 2<br>(0.65-1.1)                              | Lignins                  | 10.28    | 0.25    | 1.04     | 0.41     | 0.0488   | 0.0136   |
|                                              | Tannins                  | 5.83     | 0.01    | 1.12     | 0.77     | 0.0640   | 0.0429   |
|                                              | Unsaturated hydrocarbons | 14.60    | 0.62    | 0.93     | 0.05     | 0.1183   | 0.0572   |
|                                              | Proteins                 | 3.64     | 0.00    | 1.72     | 0.53     | 0.0726   | 0.0435   |
|                                              | Carbohydrates            | 2.51     | 0.00    | 1.79     | 0.86     | 0.0657   | 0.0908   |
|                                              | Condensed aromatics      | 15.18    | 0.75    | 0.58     | 0.28     | 0.0616   | 0.0037   |
|                                              | Lipids                   | 5.50     | 0.02    | 1.56     | 0.27     | 0.0670   | 0.0132   |
| 3<br>(1.1-2.1)                               | Lignins                  | 9.96     | 0.25    | 1.04     | 0.40     | 0.0412   | 0.0142   |
|                                              | Tannins                  | 5.23     | 0.01    | 1.21     | 0.76     | 0.0473   | 0.0630   |
|                                              | Unsaturated hydrocarbons | 17.00    | 0.45    | 1.09     | 0.10     | 0.0233   | 0.0000   |
|                                              | Proteins                 | 3.44     | 0.00    | 1.72     | 0.56     | 0.0777   | 0.0499   |
|                                              | Carbohydrates            | 2.40     | 0.00    | 1.79     | 0.86     | 0.0643   | 0.0988   |
|                                              | Condensed aromatics      | 13.24    | 0.72    | 0.57     | 0.28     | 0.0333   | 0.0000   |
|                                              | Lipids                   | 3.00     | 0.02    | 1.78     | 0.27     | 0.0313   | 0.0294   |
| 4<br>(2.1-3.3)                               | Lignins                  | 9.50     | 0.20    | 1.12     | 0.40     | 0.0438   | 0.0191   |
|                                              | Tannins                  | 5.20     | 0.01    | 1.20     | 0.80     | 0.0540   | 0.0729   |
|                                              | Unsaturated hydrocarbons | 18.00    | 0.70    | 0.90     | 0.02     | 0.1508   | 0.0613   |
|                                              | Proteins                 | 3.80     | 0.00    | 1.70     | 0.49     | 0.0763   | 0.0496   |
|                                              | Carbohydrates            | 2.40     | 0.00    | 1.78     | 0.87     | 0.0618   | 0.0928   |
|                                              | Condensed aromatics      | 12.63    | 0.73    | 0.57     | 0.31     | 0.0365   | 0.0000   |
| 5<br>(3.3-4.7)                               | Lignins                  | 4.94     | 0.02    | 1.65     | 0.26     | 0.0406   | 0.0205   |
|                                              | Lignins                  | 7.85     | 0.14    | 1.16     | 0.43     | 0.0351   | 0.0334   |
|                                              | Tannins                  | 4.88     | 0.01    | 1.21     | 0.81     | 0.0576   | 0.0837   |
|                                              | Unsaturated hydrocarbons | 17.20    | 0.44    | 1.11     | 0.05     | 0.0260   | 0.0313   |
|                                              | Proteins                 | 3.63     | 0.00    | 1.71     | 0.49     | 0.0768   | 0.0588   |
|                                              | Carbohydrates            | 2.26     | 0.00    | 1.80     | 0.89     | 0.0668   | 0.0995   |
| 6<br>(4.7-7.0)                               | Condensed aromatics      | 11.00    | 0.76    | 0.58     | 0.34     | 0.0526   | 0.0000   |
|                                              | Lipids                   | 4.10     | 0.01    | 1.71     | 0.25     | 0.0283   | 0.0367   |
|                                              | Lignins                  | 8.62     | 0.16    | 1.18     | 0.39     | 0.0419   | 0.0267   |
|                                              | Tannins                  | 5.09     | 0.01    | 1.21     | 0.80     | 0.0581   | 0.0855   |
|                                              | Unsaturated hydrocarbons | 27.00    | 0.57    | 0.84     | 0.07     | 0.0000   | 0.0000   |
|                                              | Proteins                 | 3.71     | 0.00    | 1.71     | 0.47     | 0.0751   | 0.0527   |
| 7<br>(7.0-11.0)                              | Carbohydrates            | 2.32     | 0.00    | 1.79     | 0.88     | 0.0662   | 0.0947   |
|                                              | Condensed aromatics      | 12.48    | 0.73    | 0.57     | 0.30     | 0.0317   | 0.0000   |
|                                              | Lipids                   | 5.22     | 0.02    | 1.64     | 0.25     | 0.0486   | 0.0194   |
|                                              | Lignins                  | 7.92     | 0.15    | 1.20     | 0.39     | 0.0361   | 0.0326   |
|                                              | Tannins                  | 4.79     | 0.01    | 1.21     | 0.82     | 0.0594   | 0.0911   |
|                                              | Unsaturated hydrocarbons | 27.00    | 0.57    | 0.84     | 0.07     | 0.0000   | 0.0000   |
| 8<br>(>11.0)                                 | Proteins                 | 3.67     | 0.00    | 1.72     | 0.46     | 0.0744   | 0.0581   |
|                                              | Carbohydrates            | 2.30     | 0.00    | 1.80     | 0.89     | 0.0664   | 0.1035   |
|                                              | Condensed aromatics      | 12.00    | 0.76    | 0.55     | 0.29     | 0.0287   | 0.0045   |
|                                              | Lipids                   | 4.82     | 0.02    | 1.66     | 0.25     | 0.0432   | 0.0282   |
|                                              | Lignins                  | 7.52     | 0.12    | 1.20     | 0.41     | 0.0259   | 0.0373   |
|                                              | Tannins                  | 4.84     | 0.01    | 1.21     | 0.80     | 0.0666   | 0.0860   |
|                                              | Unsaturated hydrocarbons | 27.00    | 0.57    | 0.84     | 0.07     | 0.0000   | 0.0000   |
|                                              | Proteins                 | 3.64     | 0.00    | 1.71     | 0.48     | 0.0747   | 0.0589   |
|                                              | Carbohydrates            | 2.27     | 0.00    | 1.80     | 0.88     | 0.0632   | 0.1030   |
|                                              | Condensed aromatics      | 13.29    | 0.73    | 0.57     | 0.22     | 0.0179   | 0.0000   |
|                                              | Lipids                   | 4.43     | 0.01    | 1.69     | 0.27     | 0.0169   | 0.0346   |

**Supplementary Table S8.** Chemical properties of the assigned compound classes of HULISs in the size-segregated aerosols collected during the postheating period.

| Stage No.<br>(Particle size, $\mu\text{m}$ ) | Class                    | Mean DBE | Mean AI | Mean H/C | Mean O/C | Mean N/C | Mean S/C |
|----------------------------------------------|--------------------------|----------|---------|----------|----------|----------|----------|
| 1<br>(0.43-0.65)                             | Lignins                  | 7.19     | 0.16    | 1.20     | 0.46     | 0.0521   | 0.0094   |
|                                              | Tannins                  | 4.36     | 0.05    | 1.30     | 0.79     | 0.0910   | 0.0348   |
|                                              | Unsaturated hydrocarbons | 16.00    | 0.41    | 1.21     | 0.04     | 0.0625   | 0.0288   |
|                                              | Proteins                 | 3.15     | 0.00    | 1.79     | 0.59     | 0.0770   | 0.0455   |
|                                              | Carbohydrates            | 2.58     | 0.00    | 1.75     | 0.84     | 0.0738   | 0.0840   |
|                                              | Condensed aromatics      | 0.00     | 0.00    | 0.00     | 0.00     | 0.0000   | 0.0000   |
|                                              | Lipids                   | 4.67     | 0.01    | 1.70     | 0.16     | 0.0185   | 0.0370   |
| 2<br>(0.65-1.1)                              | Lignins                  | 8.52     | 0.13    | 1.15     | 0.47     | 0.0532   | 0.0140   |
|                                              | Tannins                  | 5.48     | 0.01    | 1.21     | 0.78     | 0.0495   | 0.0410   |
|                                              | Unsaturated hydrocarbons | 35.00    | 0.60    | 0.83     | 0.00     | 0.0000   | 0.0172   |
|                                              | Proteins                 | 3.84     | 0.00    | 1.71     | 0.52     | 0.0708   | 0.0382   |
|                                              | Carbohydrates            | 2.61     | 0.00    | 1.76     | 0.88     | 0.0777   | 0.0770   |
|                                              | Condensed aromatics      | 13.13    | 0.74    | 0.56     | 0.35     | 0.0453   | 0.0000   |
|                                              | Lipids                   | 4.04     | 0.01    | 1.71     | 0.26     | 0.0192   | 0.0161   |
| 3<br>(1.1-2.1)                               | Lignins                  | 8.43     | 0.12    | 1.16     | 0.47     | 0.0440   | 0.0142   |
|                                              | Tannins                  | 5.27     | 0.01    | 1.24     | 0.77     | 0.0444   | 0.0435   |
|                                              | Unsaturated hydrocarbons | 27.00    | 0.57    | 0.84     | 0.07     | 0.0000   | 0.0000   |
|                                              | Proteins                 | 3.74     | 0.00    | 1.72     | 0.52     | 0.0711   | 0.0409   |
|                                              | Carbohydrates            | 2.48     | 0.00    | 1.78     | 0.87     | 0.0739   | 0.0797   |
|                                              | Condensed aromatics      | 12.33    | 0.76    | 0.56     | 0.31     | 0.0370   | 0.0000   |
|                                              | Lipids                   | 4.14     | 0.01    | 1.71     | 0.26     | 0.0316   | 0.0161   |
| 4<br>(2.1-3.3)                               | Lignins                  | 8.00     | 0.09    | 1.20     | 0.46     | 0.0276   | 0.0237   |
|                                              | Tannins                  | 5.00     | 0.01    | 1.25     | 0.78     | 0.0521   | 0.0633   |
|                                              | Unsaturated hydrocarbons | 24.00    | 0.56    | 0.87     | 0.05     | 0.0000   | 0.0111   |
|                                              | Proteins                 | 3.69     | 0.00    | 1.72     | 0.50     | 0.0702   | 0.0462   |
|                                              | Carbohydrates            | 2.40     | 0.00    | 1.79     | 0.88     | 0.0656   | 0.0844   |
|                                              | Condensed aromatics      | 13.38    | 0.73    | 0.52     | 0.35     | 0.0139   | 0.0000   |
|                                              | Lipids                   | 4.00     | 0.00    | 1.73     | 0.26     | 0.0215   | 0.0218   |
| 5<br>(3.3-4.7)                               | Lignins                  | 7.45     | 0.06    | 1.24     | 0.46     | 0.0244   | 0.0331   |
|                                              | Tannins                  | 4.89     | 0.01    | 1.25     | 0.80     | 0.0570   | 0.0721   |
|                                              | Unsaturated hydrocarbons | 25.00    | 0.58    | 0.87     | 0.05     | 0.0263   | 0.0132   |
|                                              | Proteins                 | 3.65     | 0.00    | 1.73     | 0.50     | 0.0718   | 0.0502   |
|                                              | Carbohydrates            | 2.36     | 0.00    | 1.79     | 0.88     | 0.0635   | 0.0873   |
|                                              | Condensed aromatics      | 10.33    | 0.78    | 0.48     | 0.44     | 0.0370   | 0.0000   |
|                                              | Lipids                   | 4.47     | 0.01    | 1.69     | 0.26     | 0.0237   | 0.0235   |
| 6<br>(4.7-7.0)                               | Lignins                  | 7.18     | 0.06    | 1.24     | 0.46     | 0.0230   | 0.0414   |
|                                              | Tannins                  | 5.00     | 0.01    | 1.23     | 0.81     | 0.0539   | 0.0792   |
|                                              | Unsaturated hydrocarbons | 19.67    | 0.48    | 1.05     | 0.08     | 0.0667   | 0.0333   |
|                                              | Proteins                 | 3.63     | 0.00    | 1.73     | 0.49     | 0.0730   | 0.0550   |
|                                              | Carbohydrates            | 2.32     | 0.00    | 1.80     | 0.88     | 0.0644   | 0.0912   |
|                                              | Condensed aromatics      | 11.00    | 0.75    | 0.46     | 0.38     | 0.0000   | 0.0000   |
|                                              | Lipids                   | 3.93     | 0.01    | 1.72     | 0.26     | 0.0237   | 0.0349   |
| 7<br>(7.0-11.0)                              | Lignins                  | 7.09     | 0.06    | 1.24     | 0.46     | 0.0158   | 0.0466   |
|                                              | Tannins                  | 4.94     | 0.01    | 1.22     | 0.80     | 0.0621   | 0.0793   |
|                                              | Unsaturated hydrocarbons | 27.00    | 0.55    | 0.87     | 0.08     | 0.0000   | 0.0000   |
|                                              | Proteins                 | 3.58     | 0.00    | 1.73     | 0.49     | 0.0735   | 0.0572   |
|                                              | Carbohydrates            | 2.26     | 0.00    | 1.81     | 0.89     | 0.0661   | 0.0955   |
|                                              | Condensed aromatics      | 11.00    | 0.75    | 0.46     | 0.38     | 0.0000   | 0.0000   |
|                                              | Lipids                   | 3.88     | 0.01    | 1.72     | 0.27     | 0.0196   | 0.0400   |
| 8<br>(>11.0)                                 | Lignins                  | 7.34     | 0.07    | 1.21     | 0.47     | 0.0127   | 0.0434   |
|                                              | Tannins                  | 4.97     | 0.01    | 1.22     | 0.80     | 0.0549   | 0.0844   |
|                                              | Unsaturated hydrocarbons | 27.00    | 0.57    | 0.84     | 0.07     | 0.0000   | 0.0000   |
|                                              | Proteins                 | 3.58     | 0.00    | 1.73     | 0.49     | 0.0725   | 0.0582   |
|                                              | Carbohydrates            | 2.27     | 0.00    | 1.80     | 0.89     | 0.0614   | 0.0960   |
|                                              | Condensed aromatics      | 9.50     | 0.81    | 0.51     | 0.41     | 0.0556   | 0.0000   |
|                                              | Lipids                   | 3.65     | 0.01    | 1.74     | 0.26     | 0.0178   | 0.0367   |



**Supplementary Table S9.** PM10 and PM2.5 levels measured in the Songdo area, South Korea, provided by Air Korea.

**PM<sub>10</sub> (µg/m<sup>3</sup>)**

| Pre-heating period | 1  | 2  | 3  | 4  | 5  | 6  | 7  | 8  | 9  | 10 | 11 | 12 | 13 | 14 | 15 | 16 | 17 | 18 | 19 | 20 | 21 | 22 | 23 | 24 | 25 | 26 | 27 | 28 | 29 | 30 | 1  | Ave* |
|--------------------|----|----|----|----|----|----|----|----|----|----|----|----|----|----|----|----|----|----|----|----|----|----|----|----|----|----|----|----|----|----|----|------|
| September 2017     | 34 | 36 | 35 | 64 | 33 | 34 | 39 | 56 | 45 | 47 | 53 | 31 | 40 | 39 | 23 | 25 | 43 | 32 | 21 | 30 | 43 | 47 | 20 | 18 | 31 | 40 | 43 | 63 | 46 | 18 | 21 | 38.2 |

| Heating period | 1  | 2  | 3  | 4  | 5  | 6  | 7  | 8  | 9  | 10 | 11 | 12 | 13 | 14 | 15 | 16  | 17 | 18 | 19 | 20 | 21 | 22 | 23 | 24 | 25 | 26 | 27 | 28 | 29 | 30 | 31 | Ave* |
|----------------|----|----|----|----|----|----|----|----|----|----|----|----|----|----|----|-----|----|----|----|----|----|----|----|----|----|----|----|----|----|----|----|------|
| January 2018   | 34 | 36 | 25 | 38 | 44 | 38 | 51 | 50 | 28 | 24 | 23 | 18 | 42 | 56 | 68 | 113 | 82 | 72 | 45 | 93 | 46 | 38 | 17 | 21 | 17 | 25 | 38 | 24 | 37 | 34 | 36 | 28.6 |

| Post-heating period | 1  | 2  | 3  | 4  | 5 | 6  | 7  | 8  | 9  | 10 | 11 | 12 | 13 | 14 | 15 | 16 | 17 | 18 | 19 | 20 | 21 | 22 | 23 | 24 | 25 | 26 | 27 | 28 | 29 | 30 | 31 | Ave* |
|---------------------|----|----|----|----|---|----|----|----|----|----|----|----|----|----|----|----|----|----|----|----|----|----|----|----|----|----|----|----|----|----|----|------|
| March 2018          | 37 | 54 | 41 | 24 | 8 | 29 | 29 | 33 | 47 | 32 | 56 | 88 | 74 | 21 | 21 | 15 | 27 | 49 | 28 | 19 | 15 | 29 | 46 | 75 | 94 | 65 | 73 | 45 | 41 | 51 | 45 | 43.8 |

**PM<sub>2.5</sub> (µg/m<sup>3</sup>)**

| Pre-heating period | 1  | 2  | 3  | 4  | 5  | 6  | 7  | 8  | 9  | 10 | 11 | 12 | 13 | 14 | 15 | 16 | 17 | 18 | 19 | 20 | 21 | 22 | 23 | 24 | 25 | 26 | 27 | 28 | 29 | 30 | 1  | Ave* |
|--------------------|----|----|----|----|----|----|----|----|----|----|----|----|----|----|----|----|----|----|----|----|----|----|----|----|----|----|----|----|----|----|----|------|
| September 2017     | 18 | 21 | 22 | 53 | 21 | 21 | 24 | 25 | 23 | 24 | 10 | 17 | 25 | 13 | 10 | 13 | 27 | 17 | 9  | 18 | 27 | 27 | 9  | 10 | 16 | 24 | 28 | 45 | 19 | 5  | 11 | 21.6 |

| Heating period | 1  | 2  | 3  | 4  | 5  | 6  | 7  | 8  | 9  | 10 | 11 | 12 | 13 | 14 | 15 | 16 | 17 | 18 | 19 | 20 | 21 | 22 | 23 | 24 | 25 | 26 | 27 | 28 | 29 | 30 | 31 | Ave* |
|----------------|----|----|----|----|----|----|----|----|----|----|----|----|----|----|----|----|----|----|----|----|----|----|----|----|----|----|----|----|----|----|----|------|
| January 2018   | 18 | 22 | 13 | 23 | 30 | 27 | 40 | 37 | 13 | 10 | 14 | 11 | 34 | 45 | 50 | 96 | 71 | 52 | 23 | 68 | 30 | 25 | 6  | 6  | 7  | 14 | 25 | 13 | 12 | 17 | 18 | 17.0 |

| Post-heating period | 1  | 2  | 3  | 4  | 5 | 6  | 7  | 8  | 9  | 10 | 11 | 12 | 13 | 14 | 15 | 16 | 17 | 18 | 19 | 20 | 21 | 22 | 23 | 24 | 25 | 26 | 27 | 28 | 29 | 30 | 31 | Ave* |
|---------------------|----|----|----|----|---|----|----|----|----|----|----|----|----|----|----|----|----|----|----|----|----|----|----|----|----|----|----|----|----|----|----|------|
| March 2018          | 26 | 18 | 22 | 16 | 5 | 17 | 17 | 25 | 36 | 23 | 43 | 67 | 58 | 12 | 14 | 9  | 17 | 40 | 21 | 8  | 8  | 18 | 36 | 61 | 82 | 47 | 54 | 33 | 31 | 32 | 27 | 32.0 |

\*The average values were calculated with the size-segregated sampling periods.
