# Supplementary material
Source: MDPI journal article supplement (https://www.mdpi.com/2073-4433/10/4/226)
Supplement: s1 [file s1]

Archive with 2 entries (2 files):
- atmosphere-480840-sup-1.pdf
- atmosphere-480840-sup-2_proofread.pdf
